# Supplementary material for: CCDC86 is a novel Ki-67-interacting protein important for cell division
Source: PubMed Central journal article supplement (PMC10022746; doi:10.1242/jcs.260391), 2023-01-25
Supplement: joces-136-260391-s1.pdf [file joces-136-260391-s1.pdf]

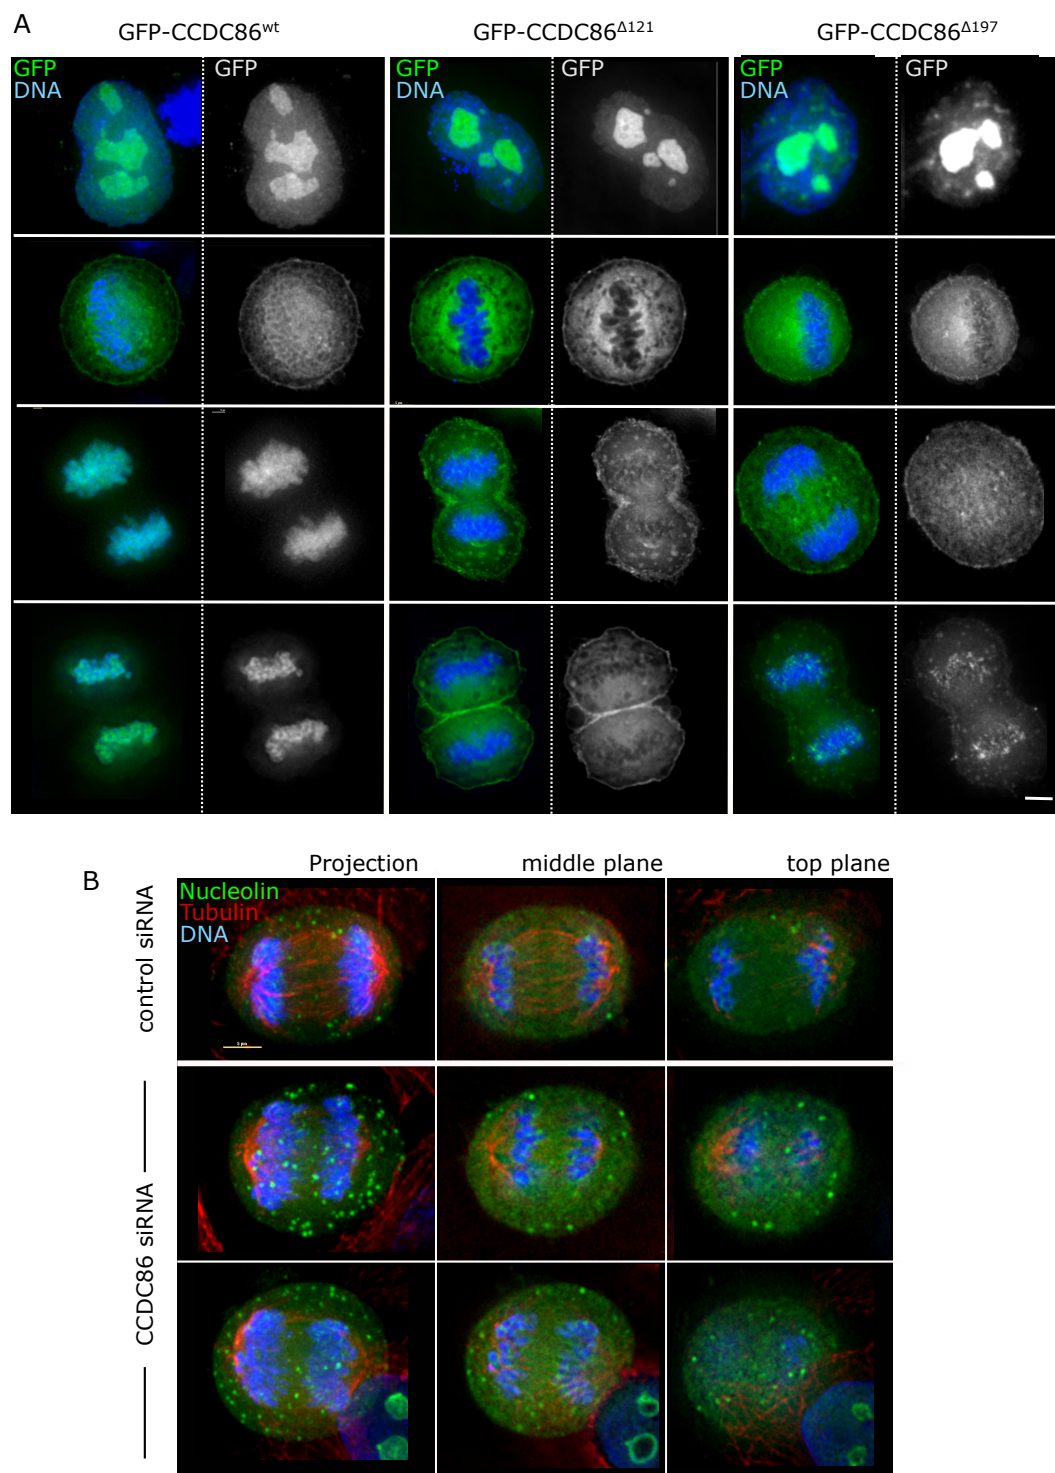

**Fig. S1.** A) Localisation of GFP-CCDC86<sup>wt</sup>, GFP-CCDC86<sup>Δ121</sup> and GFP-CCDC86<sup>Δ197</sup> in interphase (first row), prometaphase/metaphase (second row) and in anaphase/telophase (third and fourth rows). Scale bar 5 μm.

B) Localisation of the nucleolin foci in cells treated with control or CCDC86 siRNA relative to microtubules. For each cells Scale bar 5 μm.

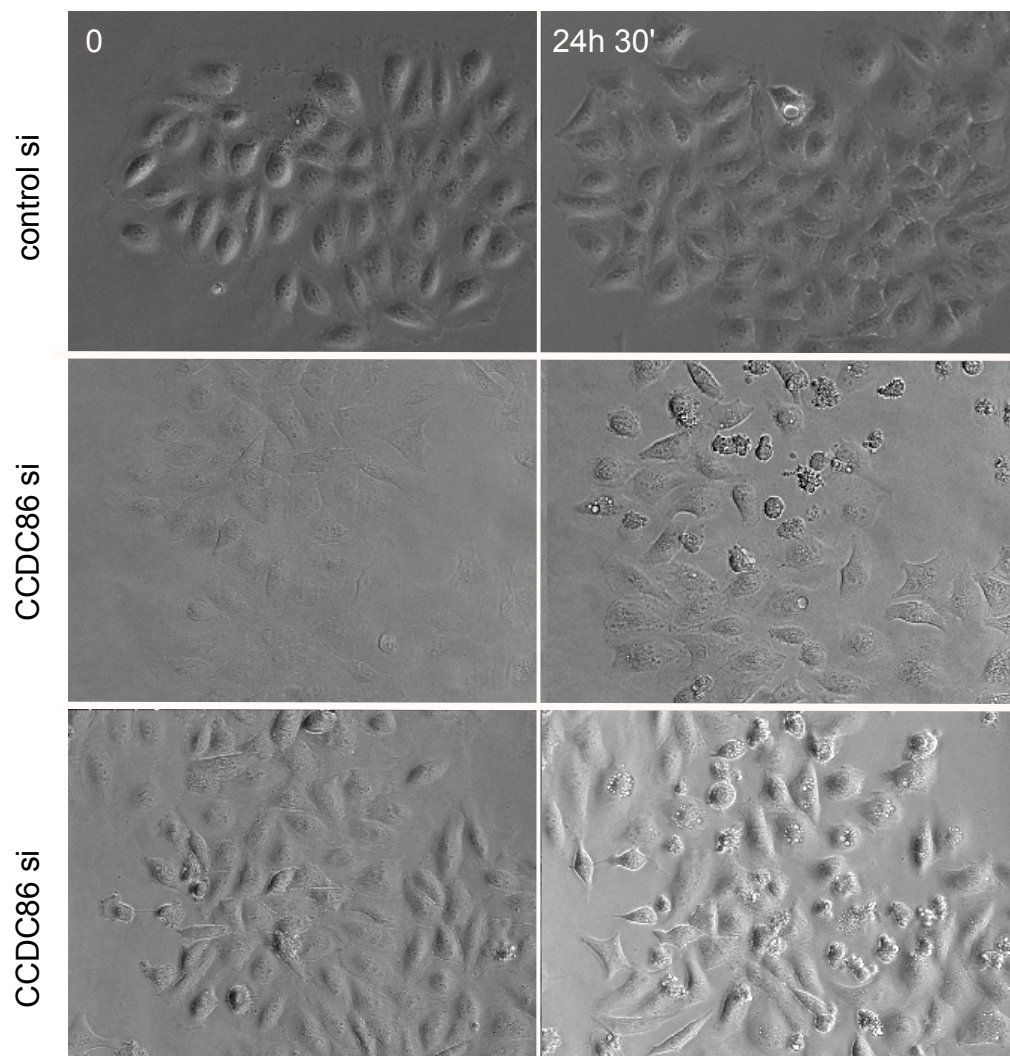

**Fig. S2.** HeLa cells were treated with control or CCDC86 siRNA and subjected to live cell imaging for 24.5 h. The figure shows representative images of a field of cells from both treatments at the beginning of the imaging and the same field at the end of the experiments.
